# Supplementary material
Source: Springer Nature journal article supplement (https://www.springermedizin.de/resource/supplementary/12885_2012_5265_MOESM5_ESM.pdf/9465442)

2 hr

10 hr

A

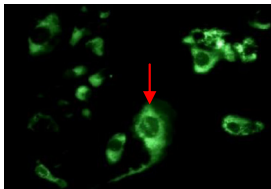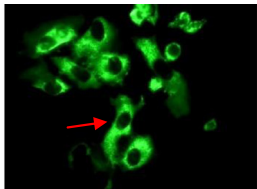

B

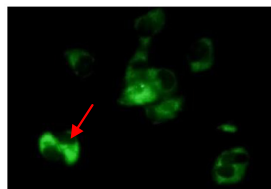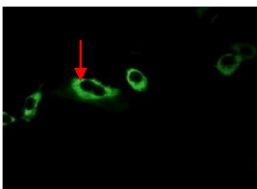

C

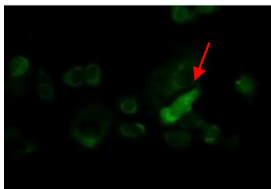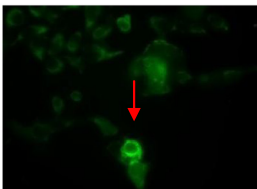

D

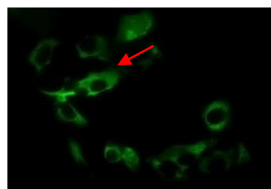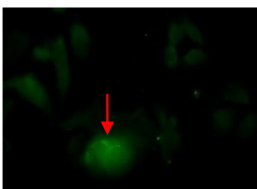

E

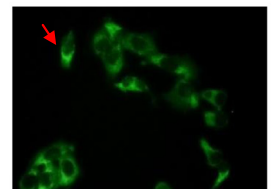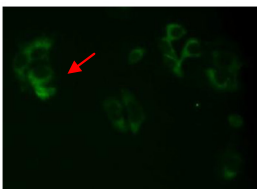

F

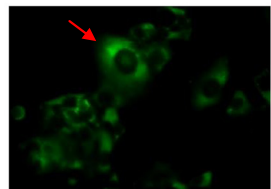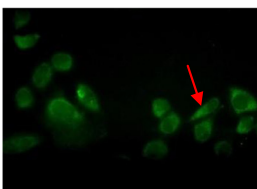

G

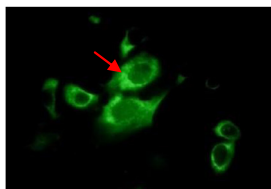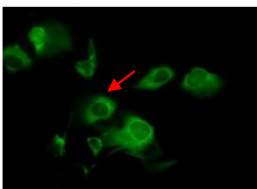

Supplement: MOESM5 [file 9465442]
